# Supplementary material for: High-efficiency solid-phase microextraction performance of polypyrrole enhanced titania nanoparticles for sensitive determination of polar chlorophenols and triclosan in environmental water samples
Source: Royal Society of Chemistry journal article supplement (doi:10.1039/d1ra04405b), 2021-01-01
Supplement: d1ra04405b1.pdf [file d1ra04405b1.pdf]

# Supporting Information

## **High-efficiency solid-phase microextraction performance of polypyrrole enhanced titania nanoparticles for sensitive determination of polar chlorophenols and triclosan in environmental water samples**

Mingguang Ma, Yunxia Wei\*, Huijuan Wei, Xianyu Liu, Haixia Liu

College of Chemistry and Chemical Engineering, Lanzhou City University, Lanzhou  
730070, China

\*Corresponding Author's Email: [weiyx07@lzu.edu.cn](mailto:weiyx07@lzu.edu.cn)

---

\* Corresponding author at: College of Chemistry and Chemical Engineering, Lanzhou City University, Lanzhou 730070, China.  
E-mail address: [weiyx07@lzu.edu.cn](mailto:weiyx07@lzu.edu.cn).

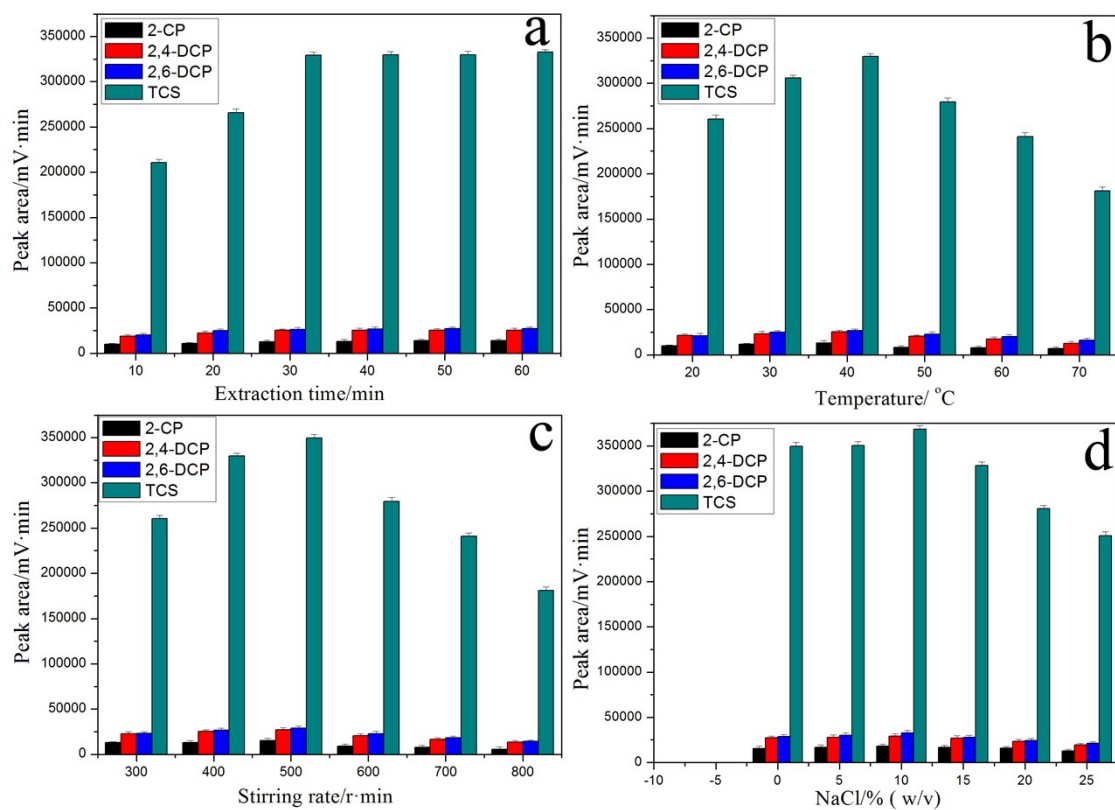

**Fig S1.** Effect of extraction time (a), temperature (b), stirring rate (c) and ionic strength (d) on extraction efficiency

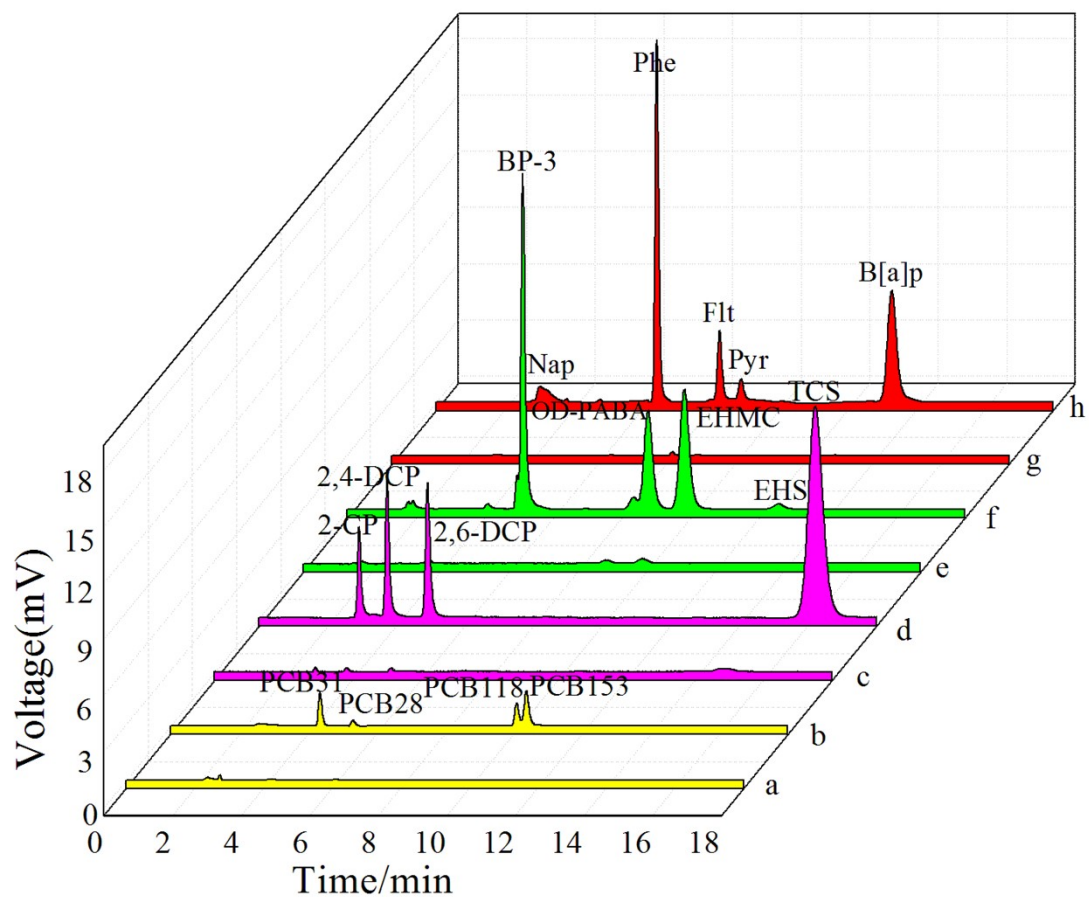

**Fig S2.**Chromatograms of SPME-HPLC for phenolic compounds. SPME-HPLC with the untreated Ti wire (a), the TiO<sub>2</sub>NPs fiber (b), the 100- $\mu$ m PDMS fiber (c), the 85- $\mu$ m PA fiber (d), PPy@TiO<sub>2</sub>NPs/Ti fiber (e) for CPs spiked at 25  $\mu$ g·L<sup>-1</sup>

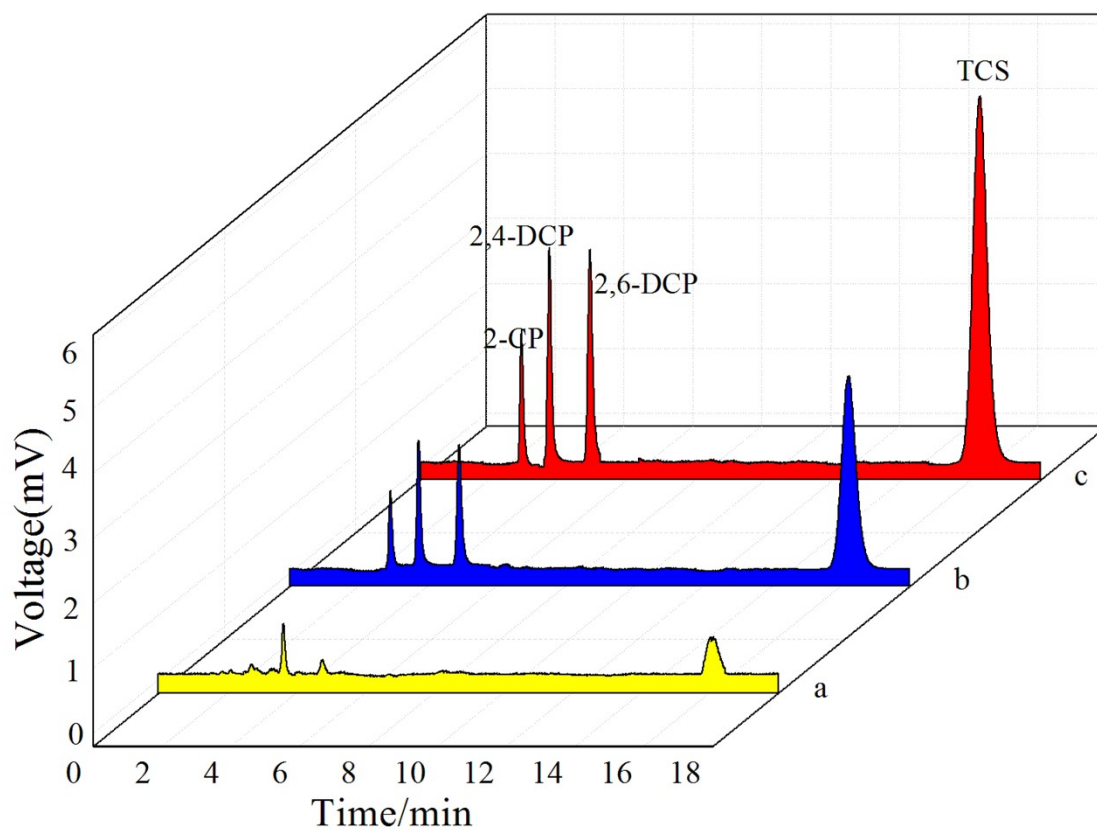

**Fig S3.** Chromatograms of SPME-HPLC for phenolic compounds in wastewater. Direct extraction (a), spiked wastewater at  $5 \mu\text{g L}^{-1}$  (b), and at  $10 \mu\text{g L}^{-1}$ (c) with the PPy@TiO<sub>2</sub>NPs/Ti fiber.
